# Supplementary material
Source: ML conference proceedings conference paper supplement (https://openaccess.thecvf.com/content/CVPRW_2020/html/Voeikov_TTNet_Real-Time_Temporal_CVPRW_2020_paper.html)
Supplement: Supplementary file 1 [file Voeikov_TTNet_Real-Time_Temporal_CVPRW_2020_supplemental.zip]

Archive with 2 entries (2 files):
- Supplementary_video.mp4
- Supplementary_video.pdf
